# Supplementary material for: Diet Quality and Dietary Inflammatory Index in Dutch Inflammatory Bowel Disease and Irritable Bowel Syndrome Patients
Source: MDPI journal article supplement (doi:10.3390/nu14091945), 2022-05-06
Supplement: s1 [file s1]

## Supplementary Materials

**Table S1.** Dietary indices, intestinal inflammation and gastrointestinal symptoms per disease activity status for inflammatory bowel disease.

|                       | Remission<br>( <i>n</i> = 158) |                   | Active disease<br>( <i>n</i> = 80) |                  | p-Value |
|-----------------------|--------------------------------|-------------------|------------------------------------|------------------|---------|
| DHD-2015              | 71.15 ± 16.72                  | ( <i>n</i> = 158) | 64.74 ± 15.38                      | ( <i>n</i> = 80) | 0.004   |
| ADII                  | -0.055 ± 2.107                 | ( <i>n</i> = 158) | 0.263 ± 2.932                      | ( <i>n</i> = 80) | 0.390   |
| Calprotectin (µg/g)   | 42.6 ± 50.7                    | ( <i>n</i> = 137) | 491.5 ± 627.4                      | ( <i>n</i> = 72) | <0.001  |
| GSRS                  |                                |                   |                                    |                  |         |
| Abdominal pain        | 2.0 ± 0.9                      | ( <i>n</i> = 55)  | 2.3 ± 1.1                          | ( <i>n</i> = 25) | 0.097   |
| Constipation syndrome | 1.7 ± 1.0                      | ( <i>n</i> = 52)  | 2.2 ± 1.1                          | ( <i>n</i> = 25) | 0.102   |
| Diarrhoea syndrome    | 2.4 ± 1.4                      | ( <i>n</i> = 53)  | 3.3 ± 1.5                          | ( <i>n</i> = 24) | 0.013   |
| Indigestion syndrome  | 2.6 ± 1.0                      | ( <i>n</i> = 55)  | 3.1 ± 1.5                          | ( <i>n</i> = 25) | 0.193   |
| Reflux syndrome       | 1.4 ± 0.7                      | ( <i>n</i> = 55)  | 1.5 ± 0.8                          | ( <i>n</i> = 25) | 0.525   |

DHD-2015 = Dutch Healthy Diet index 2015; ADII = Adapted Dietary Inflammatory Index; GSRS = Gastrointestinal Symptom Rating Scale.

Continuous data expressed as mean ± standard deviation (SD). Difference between phenotypes was tested with two-sample t-test.

**Table S2.** Dietary indices, intestinal inflammation and gastrointestinal symptoms per inflammatory bowel disease phenotype.

|                       | Crohn's disease<br>( <i>n</i> = 156) |                   | Ulcerative colitis<br>( <i>n</i> = 82) |                  | p-Value |
|-----------------------|--------------------------------------|-------------------|----------------------------------------|------------------|---------|
| DHD-2015              | 65.47 ± 15.94                        | ( <i>n</i> = 156) | 75.71 ± 15.61                          | ( <i>n</i> = 82) | <0.001  |
| ADII                  | 0.193 ± 2.53                         | ( <i>n</i> = 156) | -0.217 ± 2.18                          | ( <i>n</i> = 82) | 0.214   |
| Calprotectin (µg/g)   | 199.3 ± 411.5                        | ( <i>n</i> = 136) | 193.4 ± 455.6                          | ( <i>n</i> = 73) | 0.924   |
| GSRS                  |                                      |                   |                                        |                  |         |
| Abdominal pain        | 2.1 ± 0.9                            | ( <i>n</i> = 51)  | 2.0 ± 1.0                              | ( <i>n</i> = 29) | 0.507   |
| Constipation syndrome | 2.0 ± 1.2                            | ( <i>n</i> = 48)  | 1.6 ± 0.8                              | ( <i>n</i> = 29) | 0.053   |
| Diarrhoea syndrome    | 2.9 ± 1.6                            | ( <i>n</i> = 48)  | 2.3 ± 1.2                              | ( <i>n</i> = 29) | 0.047   |
| Indigestion syndrome  | 2.8 ± 1.2                            | ( <i>n</i> = 51)  | 2.6 ± 1.2                              | ( <i>n</i> = 29) | 0.487   |
| Reflux syndrome       | 1.5 ± 0.9                            | ( <i>n</i> = 51)  | 1.3 ± 0.6                              | ( <i>n</i> = 29) | 0.272   |

DHD-2015 = Dutch Healthy Diet index 2015; ADII = Adapted Dietary Inflammatory Index; GSRS = Gastrointestinal Symptom Rating Scale.

Continuous data expressed as mean ± standard deviation (SD). Difference between phenotypes was tested with two-sample t-test.

**Table S3.** Intestinal inflammation and gastrointestinal symptoms per irritable bowel syndrome subtype.

|                       | <b>IBS-C</b><br>( <i>n</i> = 56) |                  | <b>IBS-D</b><br>( <i>n</i> = 93) |                  | <b>IBS-M</b><br>( <i>n</i> = 103) |                   | <b>p-Value</b> |
|-----------------------|----------------------------------|------------------|----------------------------------|------------------|-----------------------------------|-------------------|----------------|
| DHD-2015              | 73.39 ± 15.41                    | ( <i>n</i> = 56) | 72.41 ± 17.30                    | ( <i>n</i> = 93) | 70.53 ± 16.76                     | ( <i>n</i> = 103) | 0.541          |
| ADII                  | -0.133 ± 2.483                   | ( <i>n</i> = 56) | 0.142 ± 2.770                    | ( <i>n</i> = 93) | 0.113 ± 2.221                     | ( <i>n</i> = 103) | 0.786          |
| Calprotectin (µg/g)   | 59.0 ± 56.5                      | ( <i>n</i> = 17) | 46.3 ± 61.8                      | ( <i>n</i> = 33) | 85.9 ± 114.1                      | ( <i>n</i> = 37)  | 0.163          |
| GSRs                  |                                  |                  |                                  |                  |                                   |                   |                |
| Abdominal pain        | 3.4 ± 1.1                        | ( <i>n</i> = 56) | 3.3 ± 1.3                        | ( <i>n</i> = 92) | 3.4 ± 1.3                         | ( <i>n</i> = 101) | 0.801          |
| Constipation syndrome | 4.4 ± 1.3                        | ( <i>n</i> = 56) | 2.6 ± 1.0                        | ( <i>n</i> = 91) | 3.5 ± 1.2                         | ( <i>n</i> = 101) | <0.001         |
| Diarrhoea syndrome    | 2.2 ± 1.1                        | ( <i>n</i> = 56) | 3.9 ± 1.5                        | ( <i>n</i> = 91) | 3.5 ± 1.4                         | ( <i>n</i> = 102) | <0.001         |
| Indigestion syndrome  | 4.2 ± 1.2                        | ( <i>n</i> = 55) | 4.1 ± 1.4                        | ( <i>n</i> = 92) | 4.2 ± 1.3                         | ( <i>n</i> = 101) | 0.994          |
| Reflux syndrome       | 2.4 ± 1.5                        | ( <i>n</i> = 56) | 2.1 ± 1.3                        | ( <i>n</i> = 92) | 2.2 ± 1.4                         | ( <i>n</i> = 101) | 0.321          |

IBS = irritable bowel syndrome; IBS-C = constipation predominant IBS; IBS-D = diarrhoea predominant IBS; IBS-M = mixed stool pattern IBS; DHD-2015 = Dutch Healthy Diet index 2015; ADII = Adapted Dietary Inflammatory Index; GSRs = Gastrointestinal Symptom Rating Scale.

Difference between subtypes was tested with ANOVA and post-hoc Bonferroni correction. Unspecified subtype IBS (IBS-U) was not included in this comparison due to the small sample size (*n* = 9).
